# Supplementary material for: Purple Sweet Potato Powder Containing Anthocyanin Mitigates High-Fat-Diet-Induced Dry Eye Disease
Source: MDPI journal article supplement (doi:10.3390/ijms24086983), 2023-04-10
Supplement: s1 [file s1]

Supplementary table S1. Diet formula for animal treatment.

|                            | Control | HFD     | PSP     | S                                 |
|----------------------------|---------|---------|---------|-----------------------------------|
| cornstarch                 | 904     | 524     | 441.2   | 524                               |
| destrinized cornstarch     | 310     | 310     | 310     | 310                               |
| casein                     | 308     | 308     | 306.2   | 308                               |
| sucrose                    | 200     | 200     | 183.8   | 200                               |
| soybean oil                | 80      | 80      | 80      | 80                                |
| lard                       | 0       | 380     | 380     | 380                               |
| fiber                      | 100     | 100     | 100     | 100                               |
| mineral mix                | 70      | 70      | 70      | 70                                |
| vitamin mix                | 20      | 20      | 20      | 20                                |
| cystine                    | 3.6     | 3.6     | 3.6     | 3.6                               |
| choline bitartrate         | 5       | 6       | 6       | 6                                 |
| tert-butylhydroquinone     | 0.02    | 0.02    | 0.02    | 0.02                              |
| purple sweet potato powder |         |         | 100     |                                   |
| atorvastatin               |         |         |         | 10 mg/kg<br>BW,<br>oral<br>gavage |
| total                      | 1000.31 | 1000.81 | 1000.36 | 1000.81                           |

Supplementary table S2. Quantification of PSP reduced LG atrophy in HFD-treated rats<sup>1</sup>.

|                | Group C <sup>2</sup> | Group H*        | Group PSP <sup>#</sup> | Group S*        |
|----------------|----------------------|-----------------|------------------------|-----------------|
| 1              | 259255               | ND              | ND                     | 269997          |
| 2              | ND <sup>3</sup>      | ND              | ND                     | 1731599         |
| 3              | 297875               | 1407767         | ND                     | 455544          |
| 4              | 336159               | 1138076         | 658279                 | 286032          |
| 5              | ND                   | 806645          | ND                     | 2403207         |
| 6              | ND                   | 1203384         | ND                     | ND              |
| 7              | ND                   | 407590          | 415863                 | ND              |
| 8              | ND                   | 499048          | ND                     | ND              |
| 9              | ND                   | 290606          | 808752                 | ND              |
| 10             | 430607               | 596787          | ND                     | ND              |
| <b>Average</b> | <b>132389.6</b>      | <b>634990.3</b> | <b>188289.4</b>        | <b>541820.9</b> |

<sup>1</sup> The animals were treated with a high fat diet (HFD) along or supplemented with PSP (5%) or atorvastatin (S) for 19 weeks. The control group was given the control diet. Values (means  $\pm$  SD, n = 8–9) not sharing a common letter in the same row are significantly different (p < 0.05).

<sup>2</sup> Ten photos randomly selected from each group to quantified the level of LG atrophy,

\*p<0.05 when compared with the control group; #p<0.05, compared with group H.

<sup>3</sup> ND, not detected, means the LG without atrophy signals.

In this study, 10 LG biopsy slides were randomly selected from each group, and the atrophy area was used as an index to evaluate the degree of atrophy. The pixel densities in the mean areas of LG atrophy were 132,390, 634,990, 188,289, and 541,820 in the control group (n = 10), group H (n = 10), group PSP (n = 10), and group S (n = 10), respectively.
